# Supplementary material for: Quaternization and oxidation reactions of cyclodiphosphazane derivatives and their copper(i) and gold(i) complexes
Source: Royal Society of Chemistry journal article supplement (doi:10.1039/c4dt00801d), 2014-01-01
Supplement: c4dt00801d1.pdf [file c4dt00801d1.pdf]

## Supporting Information

### **Quaternization and oxidation reactions of cyclodiphosphazane derivatives and their copper(I) and gold(I) complexes**

Maravanji S. Balakrishna,<sup>\*,a</sup> Devarajan Suresh,<sup>a</sup> Guddekoppa S. Ananthnag<sup>a</sup> and Joel T. Mague<sup>b</sup>

*<sup>a</sup>Phosphorus Laboratory, Department of Chemistry, Indian Institute of Technology Bombay,  
Mumbai 400 076, India.*

*<sup>b</sup>Department of Chemistry, Tulane University, New Orleans, LA 70118, USA.*

---

---

\* To whom correspondence should be addressed. E-mail: [krishna@chem.iitb.ac.in](mailto:krishna@chem.iitb.ac.in) or [mbs\\_krishna@iitb.ac.in](mailto:mbs_krishna@iitb.ac.in). Fax: +91-22-5172-3480/2576-7152

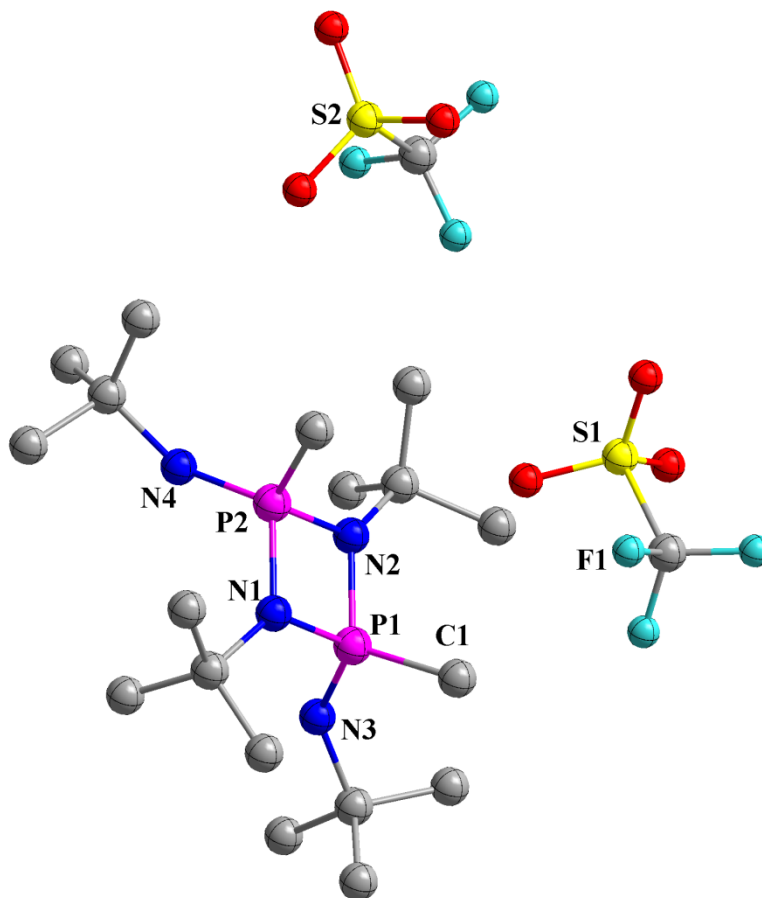

**Figure S1.** The molecular structure of *cis*-{*t*BuN(H)P(CH<sub>3</sub>)(μ-*Nt*Bu)<sub>2</sub>P(CH<sub>3</sub>)N(H)*t*Bu}(OTf)<sub>2</sub> (6). All hydrogen atoms were omitted for clarity. Thermal ellipsoids are drawn at 50% probability level.

|                |                                                                                                    |
|----------------|----------------------------------------------------------------------------------------------------|
| Formula        | C <sub>18</sub> H <sub>42</sub> N <sub>4</sub> P <sub>2</sub> ·2(CF <sub>3</sub> O <sub>3</sub> S) |
| Formula Weight | 674.64                                                                                             |
| Crystal System | Triclinic                                                                                          |
| R              | 0.1657                                                                                             |
